# Supplementary material for: Prokineticin 1–prokineticin receptor 1 signaling in trophoblast promotes embryo implantation and placenta development
Source: PubMed Central journal article supplement (PMC8253840; doi:10.1038/s41598-021-93102-1), 2021-07-02
Supplement: 41598_2021_93102_MOESM1_ESM.pdf [file 41598_2021_93102_MOESM1_ESM.pdf]

## **Supplementary Information**

### **Prokineticin 1–prokineticin receptor 1 signaling in trophoblast promotes embryo implantation and placenta development**

Ewelina Goryszewska<sup>1</sup>, Monika Baryla<sup>1</sup>, Piotr Kaczynski<sup>1</sup>, and Agnieszka Waclawik<sup>1\*</sup>

<sup>1</sup> Institute of Animal Reproduction and Food Research of the Polish Academy of Sciences,  
Tuwima 10, 10-748 Olsztyn, Poland.

## **Supplementary data summary:**

**Supplementary Figure 1.** Uncropped Western blot images displayed in Figure 6A for expression of: mitogen-activated protein kinase (MAPK1/3) (A, B); phosphorylated MAPK1/3 (pMAPK1/3) (C, D); glyceraldehyde-3-phosphate dehydrogenase (GAPDH) (E, F) in samples from days 15 (A, C and E) and 20 of pregnancy (B, D and F). (E) and (F) Western blots were reprobed with GAPDH antibodies. The dotted rectangles delineate the areas shown in Fig. 6A.

**Supplementary Figure 2.** Uncropped Western blot images displayed in Figure 6B for expression of: protein tyrosine kinase 2 (PTK2) (A, B); phosphorylated PTK2 (pPTK2) (C, D); glyceraldehyde-3-phosphate dehydrogenase (GAPDH) (E, F) in samples from days 15 (A, C and E) and 20 of pregnancy (B, D and F). (E) and (F) Western blots were reprobed with GAPDH antibodies. The dotted rectangles delineate the areas shown in Fig. 6B.

**Supplementary Table 1.** Primer sequences and assays used in real-time RT-PCR analyses and condition of real-time RT-PCR.

**Supplementary Table 2.** List of antibodies used in Western blot experiments.

**Supplementary Table 3.** List of selected (z-score above 1.7) processes and functions potentially affected by PROK1 obtained by diseases and biofunctions analysis in Ingenuity Pathway Analysis Software. *Separate Microsoft Excel file attached to this article.*

## Supplementary Figure 1

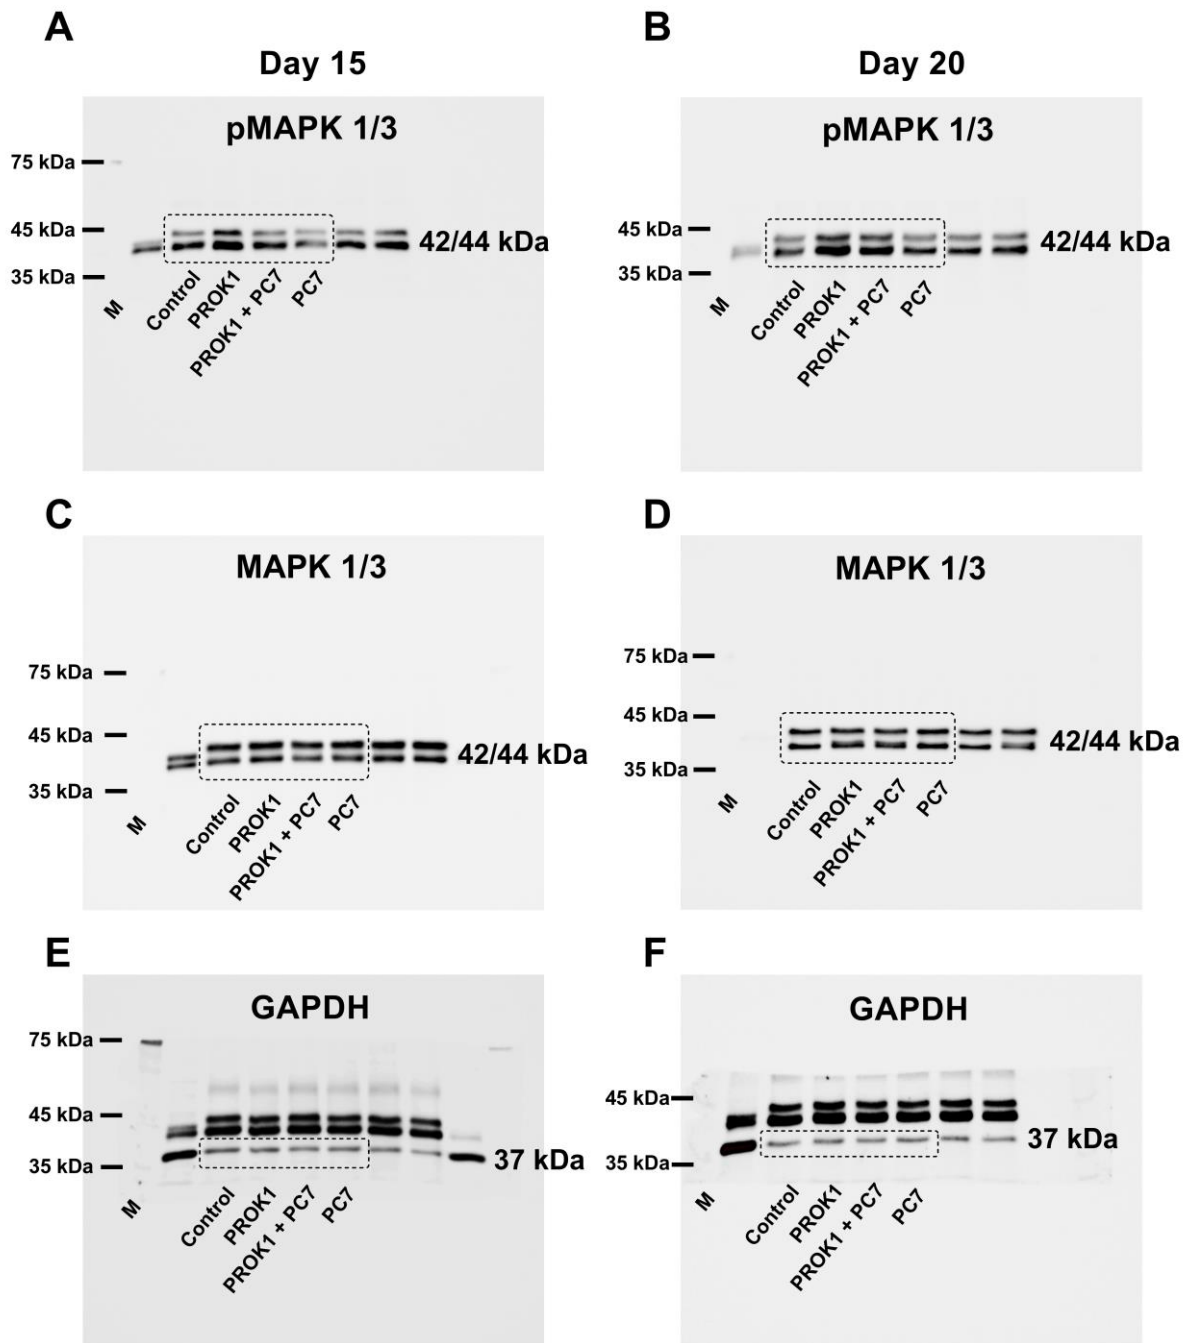

**Supplementary Figure 1.** Uncropped Western blot images displayed in Figure 6A for expression of: mitogen-activated protein kinase (MAPK1/3) (A, B); phosphorylated MAPK1/3 (pMAPK1/3) (C, D); glyceraldehyde-3-phosphate dehydrogenase (GAPDH) (E, F) in samples from days 15 (A, C and E) and 20 of pregnancy (B, D and F). (E) and (F) Western blots were reprobed with GAPDH antibodies. The dotted rectangles delineate the areas shown in Fig. 6A.

## Supplementary Figure 2

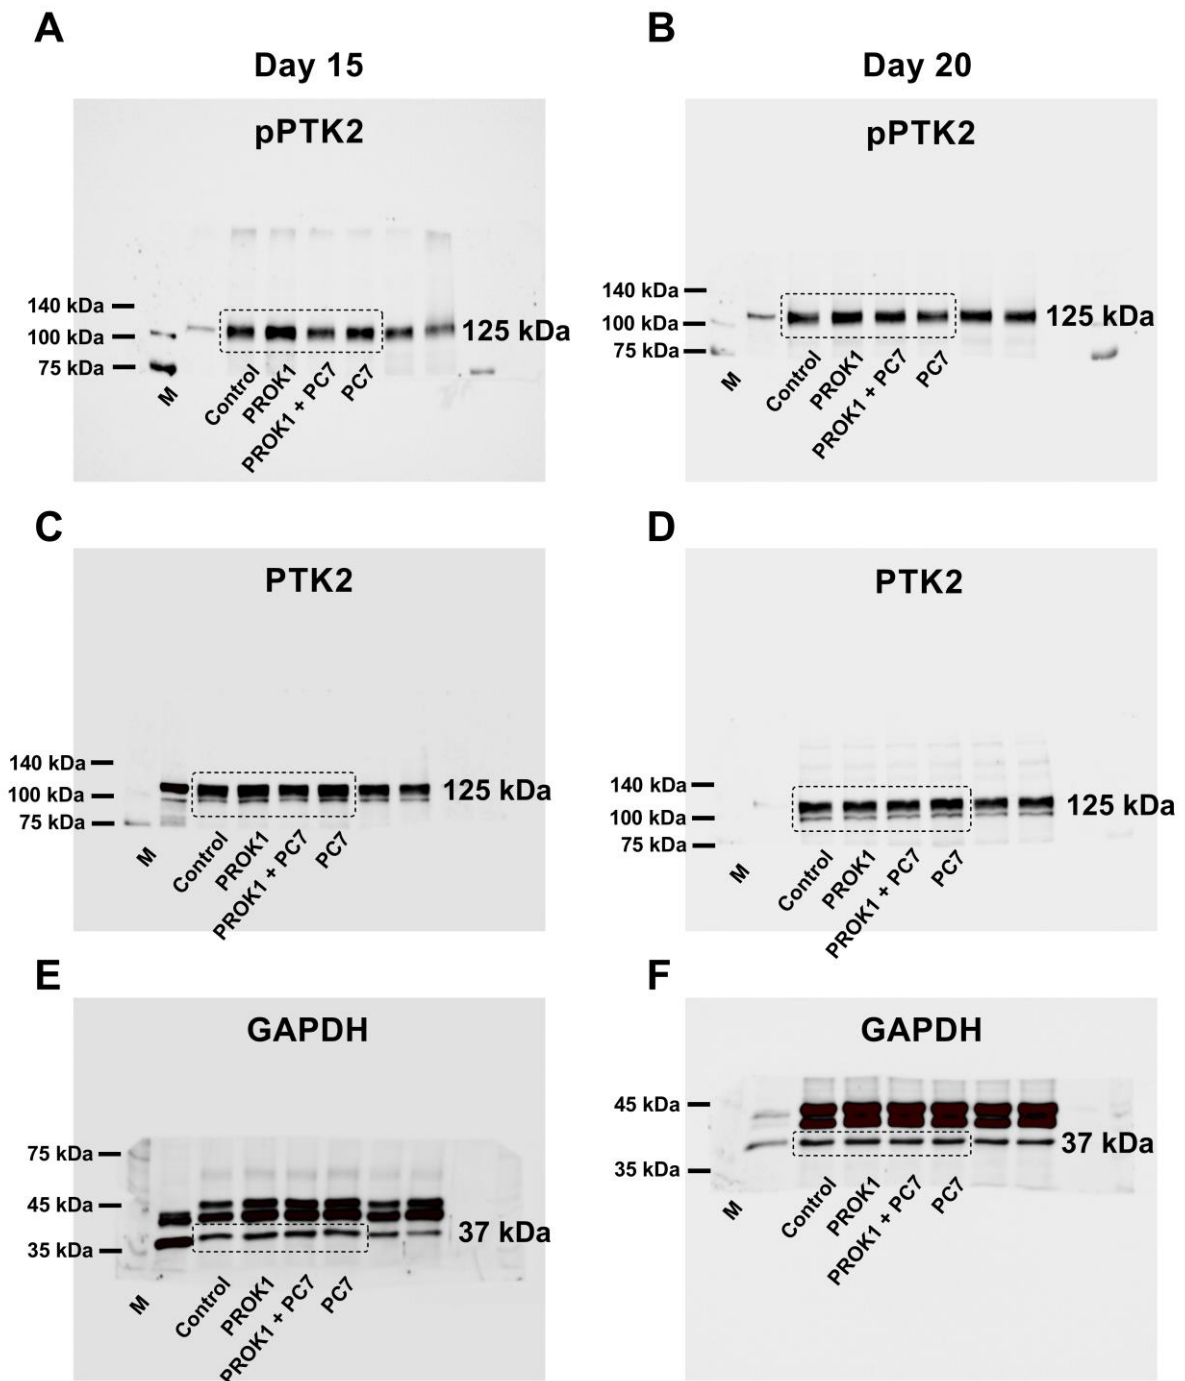

**Supplementary Figure 2.** Uncropped Western blot images displayed in Figure 6B for expression of: protein tyrosine kinase 2 (PTK2) (A, B); phosphorylated PTK2 (pPTK2) (C, D); glyceraldehyde-3-phosphate dehydrogenase (GAPDH) (E, F) in samples from days 15 (A, C and E) and 20 of pregnancy (B, D and F). (E) and (F) Western blots were reprobed with GAPDH antibodies. The dotted rectangles delineate the areas shown in Fig. 6B.

**Supplementary Table 1.** Primer sequences and assays used in real-time RT-PCR analyses and condition of real-time RT-PCR.

| Gene          | Number of TaqMan probes or Primers sequences (5'-3')                               | GenBank accession no. | Conditions °C, time                                                                               |
|---------------|------------------------------------------------------------------------------------|-----------------------|---------------------------------------------------------------------------------------------------|
| <i>PROK1</i>  | Ss04246562_m1                                                                      | NM_001172586.1        | 40 cycles of: denaturation (15 s at 95°C) and annealing and elongation (60 s at 60°C)             |
| <i>ANGPT1</i> | Ss03380513_u1                                                                      | NM_001044573.2        |                                                                                                   |
| <i>ANGPT2</i> | Ss03392365_m1                                                                      | NM_213808.1           |                                                                                                   |
| <i>FGF2</i>   | Ss03375809_u1                                                                      | AJ577089.1            |                                                                                                   |
| <i>NFATC2</i> | Ss03373287_m1                                                                      | NM_001113452.1        |                                                                                                   |
| <i>RCAN1</i>  | Ss04325819_m1                                                                      | NM_001243913.1        |                                                                                                   |
| <i>FGF9</i>   | Ss03381521_s1                                                                      | NM_213801.1           |                                                                                                   |
| <i>IGF1</i>   | Ss03394499_m1                                                                      | NM_214256.1           |                                                                                                   |
| <i>TGFB3</i>  | Ss03394352_m1                                                                      | NM_214198.1           |                                                                                                   |
| <i>CCN2</i>   | Ss03392396_g1                                                                      | NM_213833.1           |                                                                                                   |
| <i>CDH1</i>   | Ss03377287_u1                                                                      | EF530350.1            |                                                                                                   |
| <i>CDH13</i>  | Ss03386756_u1                                                                      | NM_001109945.1        |                                                                                                   |
| <i>MUC4</i>   | Ss04321839_g1                                                                      | NM_001206344.1        |                                                                                                   |
| <i>SPP1</i>   | Ss03391321_m1                                                                      | NM_214023.1           |                                                                                                   |
| <i>BGN</i>    | Ss03375454_u1                                                                      | AF159382.1            |                                                                                                   |
| <i>MMP9</i>   | Ss03392100_m1                                                                      | NM_001038004.1        |                                                                                                   |
| <i>IL6</i>    | Ss03384604_u1                                                                      | NM_214399.1           |                                                                                                   |
| <i>IFNG</i>   | Ss03391052_m1                                                                      | NM_213948.1           |                                                                                                   |
| <i>TNF</i>    | Ss03391316_g1                                                                      | NM_214022.1           |                                                                                                   |
| <i>IL1B</i>   | Ss03393804_m1                                                                      | NM_214055.1           |                                                                                                   |
| <i>IL11</i>   | SsARWCWNH                                                                          | AB198667              |                                                                                                   |
| <i>GAPDH</i>  | Ss03375435_u1                                                                      | NM_001206359.1        |                                                                                                   |
| <i>ACTB</i>   | Ss03376081_u1                                                                      | AK237086.1            |                                                                                                   |
| <i>PPIA</i>   | Ss03394782_g1                                                                      | NM_214353.1           |                                                                                                   |
| <i>PROKR1</i> | Sense: 5'-GGACTTGGCACTCTCGTCTC-3'<br>Antisense: 5'-GAACAGCTCCTCCTCTCA-3'           | XM_003481198.1        | 36 cycles of: denaturation (15 s at 95°C) and annealing and elongation (60 s at 60°C)             |
| <i>FLT1</i>   | Sense: 5'-CACCCCGGAAATCTATCAGATC-3'<br>Antisense: 5'-GAGTACGTGAAGCCGCTGTTG-3'      | XM_001925740          |                                                                                                   |
| <i>KDR</i>    | Sense: 5'-GATGCTCGCTCCCTTTGA-3'<br>Antisense: 5'-AGTTCCTTCTTCAGTCGCCTACA           | XM_003128987          |                                                                                                   |
| <i>LIF</i>    | Sense: 5'-GAGCCATTTCCTCAACAACCTTG-3'<br>Antisense: 5'-TAGGCGATGATGCGGTACAG-3'      | NM_214402.2           |                                                                                                   |
| <i>LIFR</i>   | Sense: 5'-GCAGGAAGCAAACCTAGAGATTACAG-3'<br>Antisense: 5'-ACAGCAACATCACCTCCAAAT-3'  | AJ656748              |                                                                                                   |
| <i>VEGFA</i>  | Sense: 5'-GAGGCAAGAAAATCCCTGTG-3'<br>Antisense: 5'-TCACATCTGCAAGTACGTTTCG-3'       | NM_214084             |                                                                                                   |
| <i>ACTB</i>   | Sense: 5'-ACATCAAGGAGAAGCTCTGCTACG-3'<br>Antisense: 5'-GAGGGGCGATGATCTTGATCTTCA-3' | U07786                |                                                                                                   |
| <i>PPIA</i>   | Sense: 5'-TAACCCACCGTCTTCTT-3'<br>Antisense: 5'-TGCCATCCAACCACTCAG-3'              | AY266299.1            |                                                                                                   |
| <i>WNT4</i>   | Sense: 5'-GCATGTCCTGCTCGCAGAA-3'<br>Antisense: 5'-ACGCACTCAAGGAGAAGTTTGAC-3'       | NM_001170828          | 36 cycles of: denaturation (15 s at 95°C), annealing (30 s at 59°C) and elongation (60 s at 72°C) |
| <i>WNT5A</i>  | Sense: 5'-TCTCCTTCGCCAGGTTGTA-3'<br>Antisense: 5'-GGCTGTGCTCCTATGATATATACTTC-3'    | XM_005669658          |                                                                                                   |
| <i>WNT7A</i>  | Sense: 5'-TAACGAGGCAAGCCGAAAG-3'<br>Antisense: 5'-AGTGTGGTCCAGCAGGCTCTG-3'         | XM_003132396          |                                                                                                   |
| <i>GAPDH</i>  | Sense: 5'-CAGCAATGCCTCCTGTACCA-3'<br>Antisense: 5'-GATGCCGAAGTTGTATGGA-3'          | AF017079              | 36 cycles of: denaturation (15 s at 95°C), annealing (30 s at 55°C) and elongation (60 s at 72°C) |

**Supplementary Table 2.** List of antibodies used in Western blot experiments.

| <b>Protein Target</b> | <b>Name of antibody</b>                              | <b>Manufacturer, catalog no., or name of source</b> | <b>Species raised in monoclonal or polyclonal</b> | <b>Dilution Used</b> |
|-----------------------|------------------------------------------------------|-----------------------------------------------------|---------------------------------------------------|----------------------|
| PTK2                  | FAK Antibody                                         | Cell Signaling Technology, 3285                     | Rabbit, polyclonal                                | 1:300                |
| PhosphoPTK2           | Phospho-FAK (Tyr397) Antibody                        | Cell Signaling Technology, 3283                     | Rabbit, polyclonal                                | 1:300                |
| MAPK1/3               | P44/42 MAPK (Erk1/2) antibody                        | Cell Signaling, 9102S                               | Rabbit, polyclonal                                | 1:300                |
| PhosphoMAPK1/3        | Phospho-p44/42 MAPK (Erk1/2) Thr202/Tyr204) antibody | Cell Signaling, 9101                                | Rabbit, polyclonal                                | 1:300                |
| GAPDH                 | Anti-GAPDH antibody                                  | Abcam, ab9485                                       | Rabbit, polyclonal                                | 1:2000               |
| ACTB                  | Anti- $\beta$ -actin antibody                        | Abcam, ab8227                                       | Rabbit, polyclonal                                | 1:2000               |
| anti-rabbit HRP       | Immun-Star™ Goat AntiRabbit (GAR)-HRP Conjugate      | Bio-Rad Laboratories, 1705046                       | Goat, polyclonal                                  | 1:20 000             |
